# Supplementary material for: Prevalence and Risk Factors of Mental Health Problems Among Healthcare Workers During the COVID-19 Pandemic: A Systematic Review and Meta-Analysis
Source: PubMed Central journal article supplement (PMC8239157; doi:10.3389/fpsyt.2021.567381), 2021-06-15

# **Prevalence and risk factors of mental health problems among healthcare workers during the COVID-19 pandemic: a systematic review and meta-analysis**

**Qinjian Hao<sup>1a</sup>, Dahai Wang<sup>2a</sup>, Min Xie<sup>3</sup>, Yiguo Tang<sup>3</sup>, Yikai Dou<sup>3</sup>, Ling Zhu<sup>3</sup>, Yulu Wu<sup>3</sup>, Minhan Dai<sup>3</sup>, Hongmei Wu<sup>1\*</sup>, Qiang Wang<sup>3\*</sup>**

## **Item S1: Detailed search strategies for each database.**

### **PubMed search strategy**

**#1.** "coronavirus"[MeSH Terms] OR "coronavirus"[All Fields] OR "coronaviruses"[All Fields] OR "corona virus"[All Fields] OR "severe acute respiratory syndrome coronavirus 2"[Supplementary Concept] OR "severe acute respiratory syndrome coronavirus 2"[All Fields] OR "SARS-CoV-2"[All Fields] OR "2019-ncov"[All Fields] OR "COVID-19"[All Fields] OR "COVID-2019"[All Fields]

**#2.** "mental health"[MeSH Terms] OR "mental"[All Fields] OR "anxiety disorders"[MeSH Terms] OR "anxi\*"[All Fields] OR "phobic disorders"[MeSH Terms] OR "phobic"[All Fields] OR "phobia"[All Fields] OR "panic disorder"[MeSH Terms] OR "panic"[All Fields] OR "mood disorders"[MeSH Terms] OR "mood"[All Fields] OR "emotion\*"[All Fields] OR "depressive disorder"[MeSH Terms] OR "depress\*"[All Fields] OR "Stress Disorders, Traumatic"[MeSH Terms] OR "PTSD"[All Fields] OR "stress\*"[All Fields] OR "sleep wake disorders"[MeSH Terms] OR "sleep\*"[All Fields] OR "insomnia"[All Fields] OR "dyssomnia"[All Fields] OR "psych\*"[All Fields]

**#3.** 2020/1/1:3000/12/31[Date - Publication]

**#4** #1 AND #2 AND #3

### **Embase search strategy**

**#1.** 'coronavirus'/exp OR 'coronavirus' OR 'coronaviruses' OR 'corona virus'/exp OR 'corona virus' OR '2019-ncov' OR 'covid-19' OR 'covid-2019' OR 'sars-cov-2'

**#2.** 'mental health'/exp OR 'mental' OR 'anxiety disorder'/exp OR 'anxi\* ' OR 'phobia'/exp OR 'phobic' OR 'phobia' OR 'panic'/exp OR 'panic' OR 'mood disorder'/exp OR 'mood' OR 'emotio\*' OR 'depression'/exp OR 'depress\*' OR 'stress'/exp OR 'posttraumatic stress disorder'/exp OR 'acute stress disorder'/exp OR 'stress' OR 'sleep disorder'/exp OR 'sleep' OR 'insomnia' OR 'dyssomnia' OR 'psych\*'

**#3.** #1 AN #3

**#4.** #3 AND [2020-2020]/py

### Scopus search strategy

#1. ( ALL ( coronavirus ) OR ALL ( coronaviruses ) OR ALL ( "corona virus" ) OR ALL ( "severe acute respiratory syndrome coronavirus 2" ) OR ALL ( sars-cov-2 ) OR ALL ( 2019-ncov ) OR ALL ( covid-19 ) OR ALL ( covid-2019 ) )

#2. ( ALL ( mental ) OR ALL ( anxiet\* ) OR ALL ( phobic ) OR ALL ( phobia ) OR ALL ( panic ) OR ALL ( mood ) OR ALL ( emotion\* ) OR ALL ( depress\* ) OR ALL ( stress\* ) OR ALL ( sleep\* ) OR ALL ( insomnia ) OR ALL ( dyssomnia ) OR ALL ( psych\* ) )

#3. #1 AND #2

#4. #3 AND ( LIMIT-TO ( PUBYEAR , 2020 ) )

### PsycINFO search strategy

#1. ((Any Field: (coronavirus)) OR (Any Field: (coronaviruses)) OR (Any Field: ("corona virus")) OR (Any Field: ("severe acute respiratory syndrome coronavirus 2")) OR (Any Field: (SARS-CoV-2)) OR (Any Field: (2019-ncov)) OR (Any Field: (COVID-19)) OR (Any Field: (COVID-2019)))

#2. ((Any Field: (mental)) OR (Any Field: (anxiet\*)) OR (Any Field: (phobic)) OR (Any Field: (phobia)) OR (Any Field: (panic)) OR (Any Field: (mood)) OR (Any Field: (emotion\*)) OR (Any Field: (depress\*)) OR (Any Field: (stress)) OR (Any Field: (sleep)) OR (Any Field: (insomnia)) OR (Any Field: (dyssomnia)) OR (Any Field: (psych\*)))

#3. #1 AND #2

#4. #3 AND Year: 2020

**Table S1:** Influential analysis of the prevalence of depression (Random effects model)

| study                     | proportion | 95%-CI p-value   | tau <sup>2</sup> | tau    | I <sup>2</sup> |
|---------------------------|------------|------------------|------------------|--------|----------------|
| Omitting Cai et al. 2020  | 0.2566     | [0.1742; 0.3389] | 0.0222           | 0.1489 | 98.8%          |
| Omitting Duan et al. 2020 | 0.2343     | [0.1509; 0.3177] | 0.0227           | 0.1507 | 98.8%          |
| Omitting Iiu et al. 2020  | 0.2308     | [0.1495; 0.3121] | 0.0215           | 0.1467 | 98.6%          |

|                               |        |                     |        |        |       |
|-------------------------------|--------|---------------------|--------|--------|-------|
| Omitting Lai et al. 2020      | 0.2189 | [0.1554;<br>0.2824] | 0.0128 | 0.1133 | 97.7% |
| Omitting Lu et al. 2020       | 0.2510 | [0.1629;<br>0.3392] | 0.0254 | 0.1595 | 98.5% |
| Omitting Qi et al. 2020       | 0.2410 | [0.1564;<br>0.3257] | 0.0234 | 0.1530 | 98.8% |
| Omitting Sun et al. 2020      | 0.2471 | [0.1639;<br>0.3303] | 0.0226 | 0.1505 | 98.8% |
| Omitting Tan et al. 2020      | 0.2539 | [0.1700;<br>0.3378] | 0.0230 | 0.1516 | 98.7% |
| Omitting Tang et al. 2020     | 0.2279 | [0.1462;<br>0.3095] | 0.0221 | 0.1485 | 98.8% |
| Omitting Xiao et al. 2020     | 0.2425 | [0.1575;<br>0.3275] | 0.0236 | 0.1537 | 98.8% |
| Omitting Xu MC et al.<br>2020 | 0.2558 | [0.1734;<br>0.3383] | 0.0222 | 0.1491 | 98.8% |
| Omitting Xu Y et al. 2020     | 0.2302 | [0.1482;<br>0.3123] | 0.0220 | 0.1482 | 98.8% |
| Omitting zhang et al. 2020    | 0.2509 | [0.1624;<br>0.3394] | 0.0256 | 0.1601 | 98.7% |
| Omitting Zheng et al.<br>2020 | 0.2356 | [0.1522;<br>0.3191] | 0.0227 | 0.1508 | 98.8% |
| Pooled estimate               | 0.2412 | [0.1618;<br>0.3207] | 0.0222 | 0.1489 | 98.7% |

**Figure S1:** Forest plot for influential analysis of the prevalence of depression

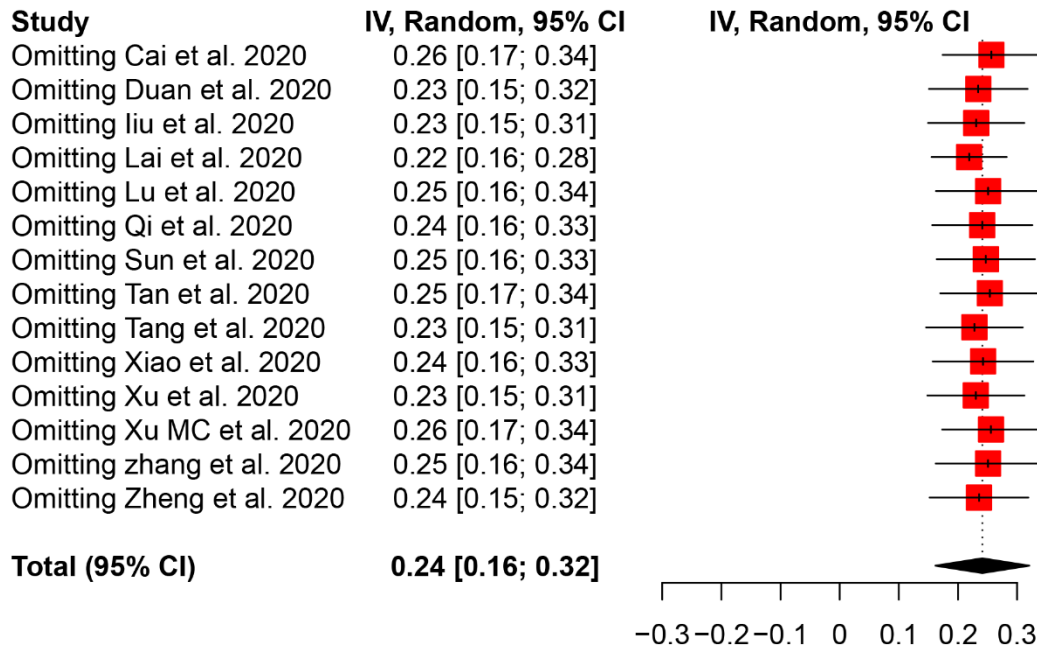

**Table S2:** Influential analysis of the prevalence of anxiety (Random effects model)

| study                      | proportion | 95%-CI p-value   | tau <sup>2</sup> | tau    | I <sup>2</sup> |
|----------------------------|------------|------------------|------------------|--------|----------------|
| Omitting Cai et al. 2020   | 0.2645     | [0.2099; 0.3334] | 0.1956           | 0.4422 | 98.3%          |
| Omitting Duan et al. 2020  | 0.2871     | [0.2227; 0.3701] | 0.2388           | 0.4886 | 98.6%          |
| Omitting Huang et al. 2020 | 0.2897     | [0.2254; 0.3724] | 0.2335           | 0.4832 | 98.6%          |
| Omitting Iiu et al. 2020   | 0.2862     | [0.2210; 0.3706] | 0.2474           | 0.4974 | 98.6%          |
| Omitting Lai et al. 2021   | 0.2763     | [0.2089; 0.3656] | 0.2919           | 0.5403 | 98.6%          |
| Omitting Lu et al. 2020    | 0.2878     | [0.2227; 0.3717] | 0.2425           | 0.4924 | 98.5%          |
| Omitting Qi et al. 2020    | 0.2839     | [0.2198; 0.3667] | 0.2427           | 0.4926 | 98.7%          |
| Omitting Sun et al. 2020   | 0.2897     | [0.2255; 0.3721] | 0.2334           | 0.4831 | 98.7%          |

|                               |        |                     |        |        |       |
|-------------------------------|--------|---------------------|--------|--------|-------|
| Omitting Tan et al. 2020      | 0.3036 | [0.2376;<br>0.3878] | 0.2225 | 0.4717 | 98.6% |
| Omitting Tang et al. 2020     | 0.2838 | [0.2209;<br>0.3646] | 0.2346 | 0.4843 | 98.7% |
| Omitting Wu et al. 2020       | 0.2662 | [0.2105;<br>0.3368] | 0.2024 | 0.4499 | 98.3% |
| Omitting Xiao et al. 2020     | 0.3016 | [0.2364;<br>0.3849] | 0.2196 | 0.4686 | 98.6% |
| Omitting Xu MC et al.<br>2020 | 0.2803 | [0.2180;<br>0.3603] | 0.2351 | 0.4849 | 98.7% |
| Omitting Xu Y et al. 2020     | 0.2937 | [0.2290;<br>0.3766] | 0.2287 | 0.4783 | 98.6% |
| Omitting Ye et al. 2020       | 0.2766 | [0.2066;<br>0.3703] | 0.3184 | 0.5643 | 98.6% |
| Omitting zhang et al. 2020    | 0.3018 | [0.2385;<br>0.3818] | 0.2032 | 0.4507 | 98.4% |
| Pooled estimate               | 0.2856 | [0.2240;<br>0.3642] | 0.2333 | 0.4830 | 98.6% |

**Figure S2:** Forest plot for influential analysis of the prevalence of anxiety

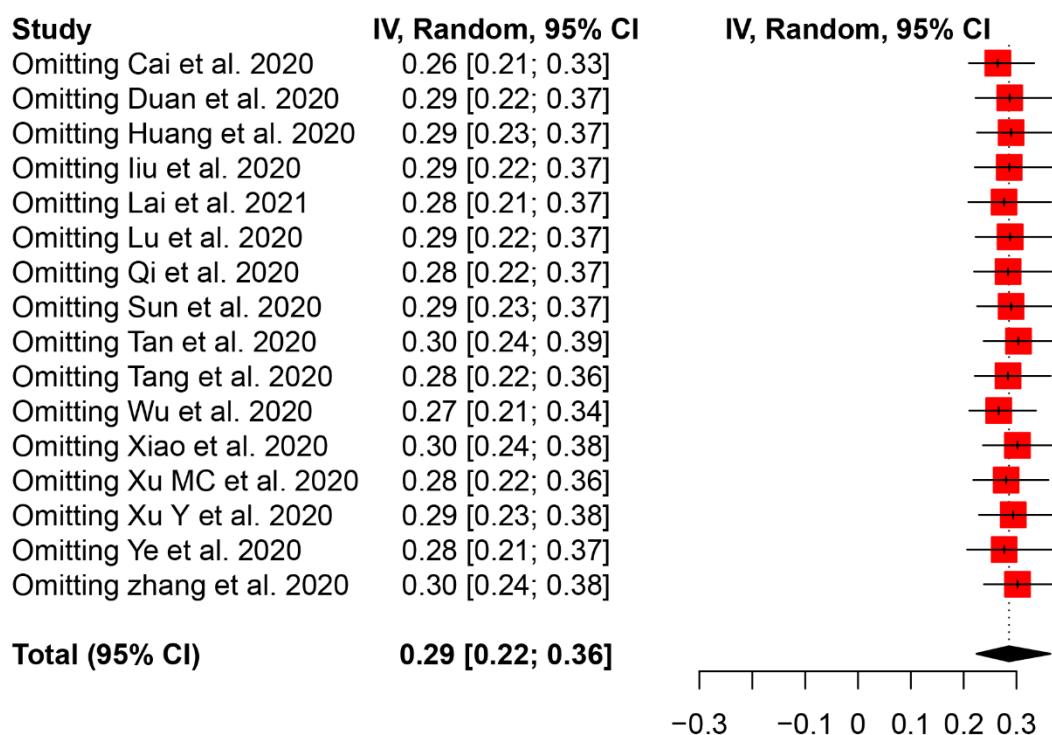

**Figure S3:** Funnel plot(a) and Egger's linear regression(b) for meta-analysis of the prevalence of depression

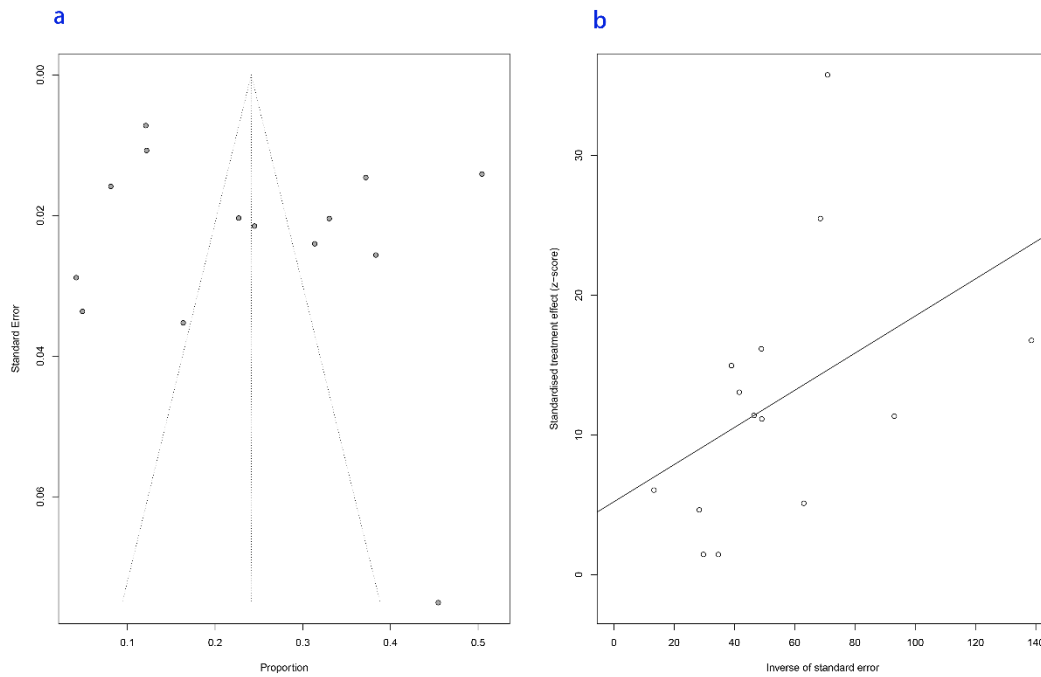

**Figure S4:** Funnel plot(a) and Egger's linear regression(b) for meta-analysis of the prevalence of anxiety

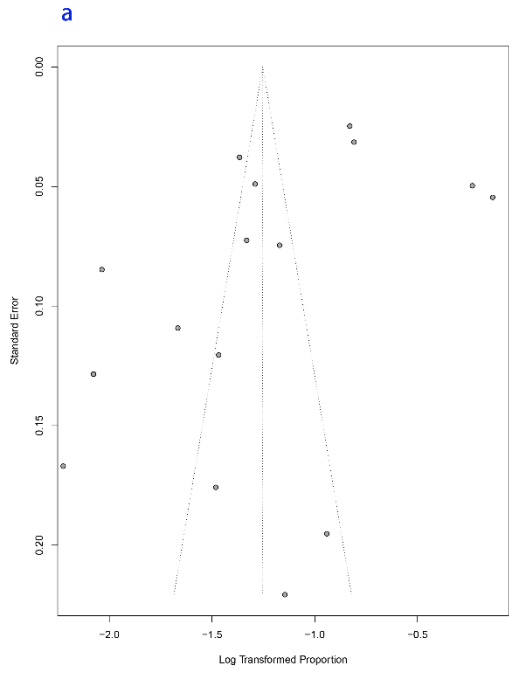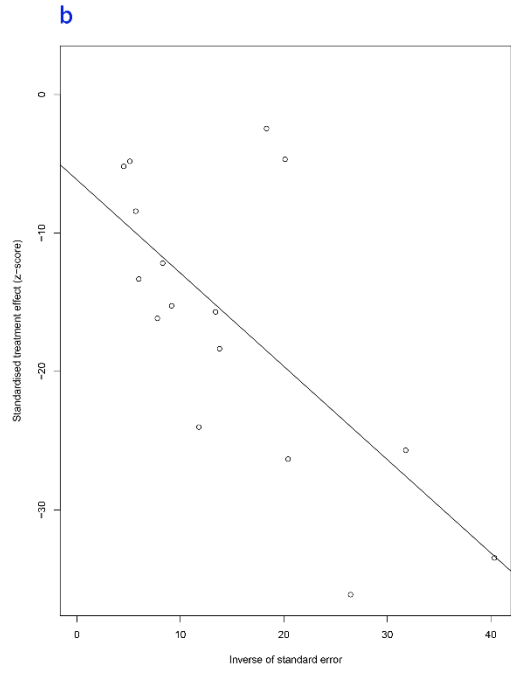

Supplement: Data_Sheet_1.pdf [file Data_Sheet_1.pdf]
